# Supplementary material for: Antitumor activities of Aspiletrein A, a steroidal saponin from Aspidistra letreae, on non-small cell lung cancer cells
Source: PubMed Central journal article supplement (PMC7941985; doi:10.1186/s12906-021-03262-w), 2021-03-09

*Supplementary information for*

**Anti-tumor activities of Aspiletrein A, a steroidal saponin from *Aspidistra letreae* on non-small cell lung cancer cells**

**Hien Minh Nguyen<sup>1</sup>, Hoai Thi Nguyen<sup>2</sup>, Suthasinee Seephan<sup>3</sup>, Hang Bich Do<sup>1</sup>, Huy Truong Nguyen<sup>1</sup>, Duc Viet Ho<sup>2,\*</sup> & Varisa Pongrakhananon<sup>4,5,\*</sup>**

<sup>1</sup>Faculty of Pharmacy, Ton Duc Thang University, Ho Chi Minh City, Vietnam

<sup>2</sup>Faculty of Pharmacy, Hue University of Medicine and Pharmacy, Hue University, Hue City, Vietnam

<sup>3</sup>Pharmaceutical Sciences and Technology Graduate Program, Faculty of Pharmaceutical Sciences, Chulalongkorn University, Bangkok, 10330, Thailand

<sup>4</sup>Department of Pharmacology and Physiology, Faculty of Pharmaceutical Sciences, Chulalongkorn University, Bangkok, 10330, Thailand

<sup>5</sup>Preclinical Toxicity and Efficacy Assessment of Medicines and Chemicals Research Cluster, Chulalongkorn University, Bangkok, 10330, Thailand

\*Correspondence: varisa.p@pharm.chula.ac.th (VP); hvietduc@hueuni.edu.vn (DVH)

**Fig. S1** The original blot for Fig 2D

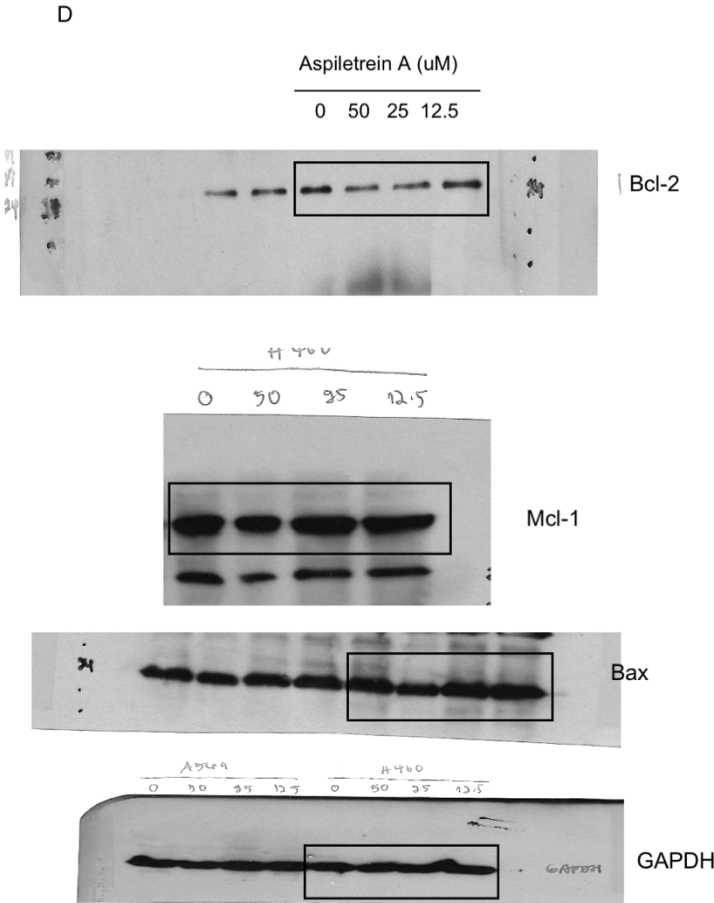

**Fig. S2** The original blot for Fig 2E

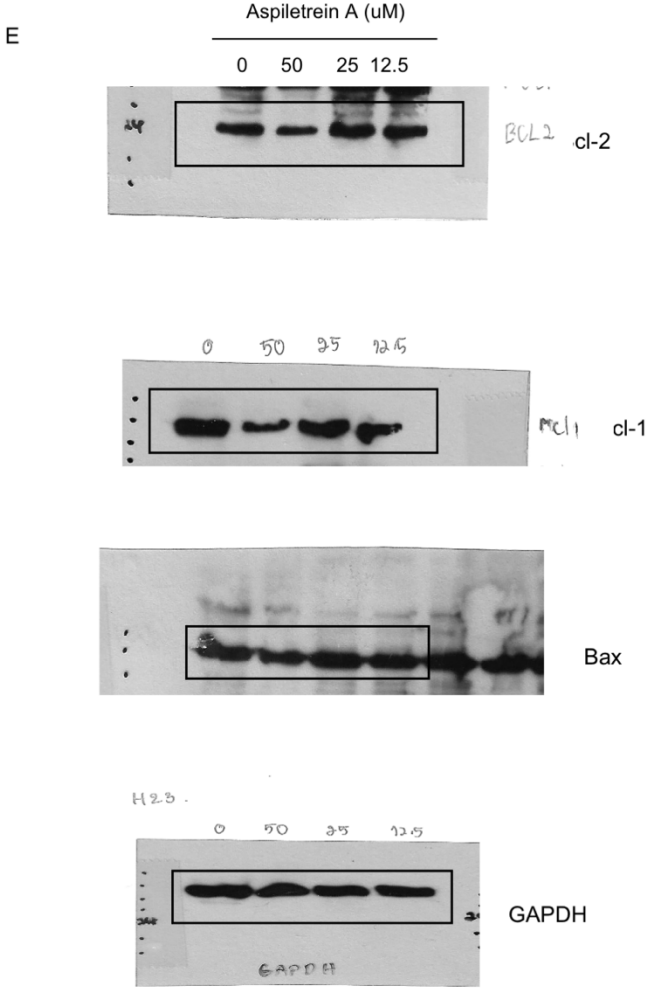

**Fig. S3** The original blot for Fig 2F

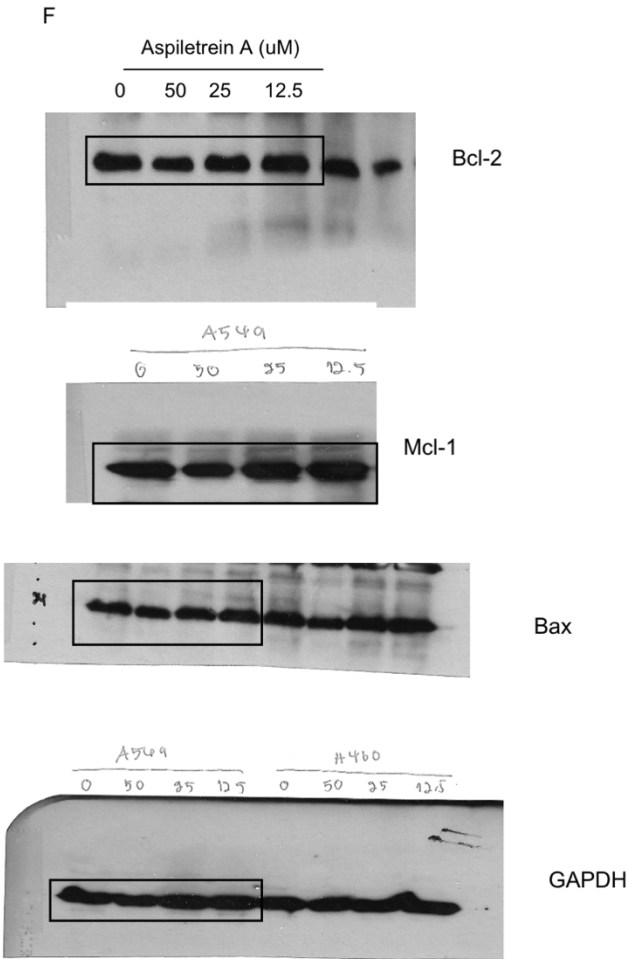

**Fig. S4** The original blot for Fig 6

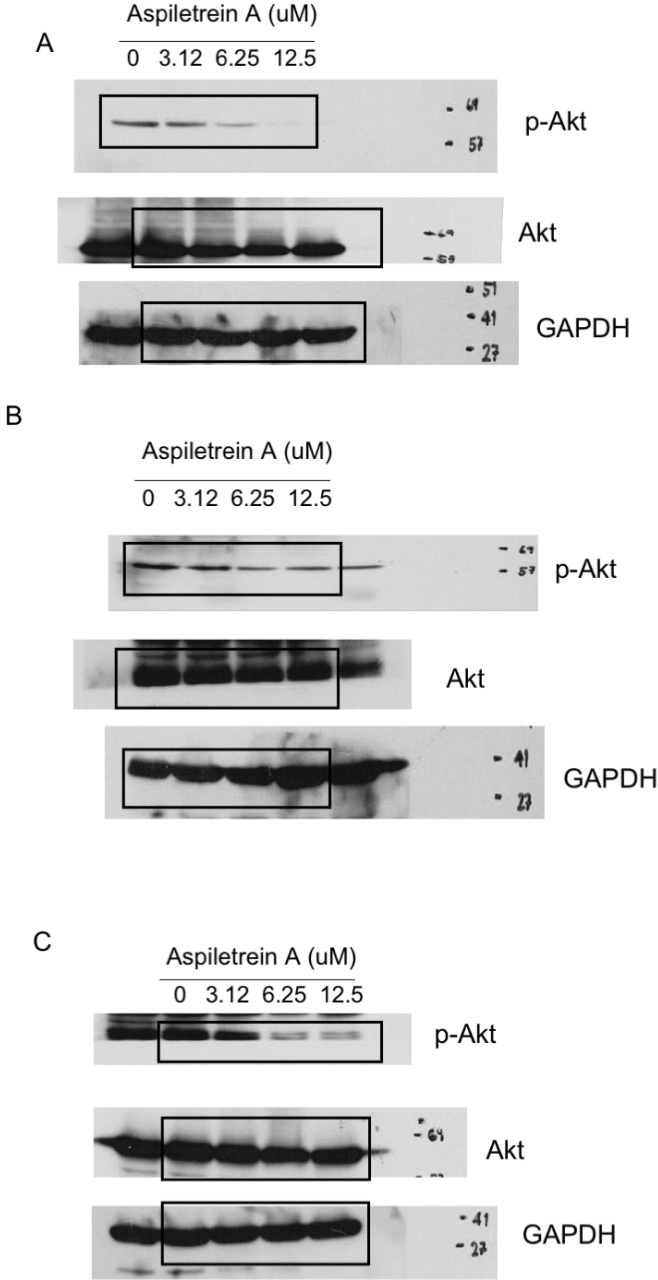

Supplement: 12906_2021_3262_MOESM1_ESM.pdf [file 12906_2021_3262_MOESM1_ESM.pdf]
